# Supplementary material for: Mapping Ecosystem Service Supply–Demand Bundles for an Integrated Analysis of Tradeoffs in an Urban Agglomeration of China
Source: MDPI journal article supplement (doi:10.3390/land11091558), 2022-09-13
Supplement: s1 [file s1]

## Supplementary Materials

**Table S1.** Key parameters of each LUCC class for the InVEST urban cooling model.

| lucode | Description               | Shade | kc    | Albedo | Green_area |
|--------|---------------------------|-------|-------|--------|------------|
| 11     | Paddy Field               | 0     | 0.7   | 0.2    | 1          |
| 12     | Irrigated land            | 0     | 0.75  | 0.2    | 1          |
| 21     | Woodland                  | 1     | 1     | 0.15   | 1          |
| 22     | Shrub                     | 0     | 0.9   | 0.225  | 1          |
| 23     | Woodland with low density | 1     | 0.9   | 0.2    | 1          |
| 24     | Other woodland            | 1     | 0.8   | 0.2    | 1          |
| 31     | High-coverage grass       | 0     | 0.6   | 0.2    | 1          |
| 32     | Medium-coverage grass     | 0     | 0.6   | 0.2    | 1          |
| 33     | Low-coverage grass        | 0     | 0.6   | 0.2    | 1          |
| 41     | River                     | 0     | 1     | 0.06   | 1          |
| 42     | Lake                      | 0     | 1     | 0.06   | 1          |
| 43     | Pond                      | 0     | 0.6   | 0.06   | 1          |
| 45     | Beach                     | 0     | 0.001 | 0.275  | 1          |
| 46     | Beachland                 | 0     | 0.001 | 0.275  | 1          |
| 51     | Urban land                | 0     | 0.001 | 0.1675 | 0          |
| 52     | Rural settlements         | 0     | 0.001 | 0.1675 | 0          |
| 53     | Other construction land   | 0     | 0.001 | 0.1675 | 0          |
| 61     | Sandy                     | 0     | 0.001 | 0.275  | 0          |
| 62     | Gobi                      | 0     | 0.001 | 0.275  | 0          |
| 63     | Saline land               | 0     | 0.001 | 0.275  | 0          |
| 64     | Marshland                 | 0     | 0.5   | 0.2    | 1          |
| 65     | Bare land                 | 0     | 0.001 | 0.275  | 0          |
| 66     | Bare rock texture         | 0     | 0.001 | 0.225  | 0          |
| 67     | others                    | 0     | 0.001 | 0.275  | 0          |

**Table S2.** The CN value for each LULC type.

| lucode | Land use type                   | A    | B     | C     | D    |
|--------|---------------------------------|------|-------|-------|------|
| 11     | Paddy Field                     | 65   | 76    | 84    | 88   |
| 12     | Irrigated land                  | 65   | 76    | 84    | 88   |
| 21     | Woodland                        | 36   | 60    | 73    | 79   |
| 22     | Shrub                           | 36   | 60    | 73    | 79   |
| 23     | Woodland<br>with low<br>density | 36   | 60    | 73    | 79   |
| 24     | Other<br>woodland               | 48   | 67.75 | 78.25 | 83.5 |
| 31     | High-coverage<br>grass          | 49   | 69    | 79    | 84   |
| 32     | Medium-<br>coverage grass       | 49   | 69    | 79    | 84   |
| 33     | Low-coverage<br>grass           | 49   | 69    | 79    | 84   |
| 41     | River                           | 99   | 99    | 99    | 99   |
| 42     | Lake                            | 99   | 99    | 99    | 99   |
| 43     | Pond                            | 99   | 99    | 99    | 99   |
| 45     | Beach                           | 35   | 56    | 70    | 77   |
| 46     | Beachland                       | 35   | 56    | 70    | 77   |
| 51     | Urban land                      | 93.5 | 95    | 96    | 96.5 |
| 52     | Rural<br>settlements            | 98   | 98    | 98    | 98   |
| 54     | Other<br>construction<br>land   | 89   | 92    | 94    | 95   |
| 61     | Sandy                           | 77   | 86    | 91    | 94   |
| 62     | Gobi                            | 77   | 86    | 91    | 94   |
| 63     | Saline land                     | 77   | 86    | 91    | 94   |
| 64     | Marshland                       | 35   | 56    | 70    | 77   |
| 65     | Bare land                       | 77   | 86    | 91    | 94   |
| 66     | Bare rock<br>texture            | 98   | 98    | 98    | 98   |
| 67     | others                          | 77   | 86    | 91    | 94   |
| 99     | Ocean                           | 99   | 99    | 99    | 99   |

**Table S3.** The components, factors, and data sources for calculating outdoor recreation potential.

| Component         | Factors                                              | Data source                                           | Distance thresholds | Description                                                                                                                                                                                   |
|-------------------|------------------------------------------------------|-------------------------------------------------------|---------------------|-----------------------------------------------------------------------------------------------------------------------------------------------------------------------------------------------|
| Naturalness       | The naturalness of different land-use types          | <a href="http://www.resdc.cn">http://www.resdc.cn</a> | N/A                 | 5: Woodlands. 4: Salt marshes, mudflats, wetlands. 3: Continental waters, shrubs. 2: Grassland, hedgerows. 1: arable land, orchards, nurseries, and trails. 0: man-made structures, bare soil |
| Nature protection | Areas designated as nature reserves or natural parks | Baidu map open data platform API interface access     | N/A                 | 2: Protected natural reserve; 1: Sites of naturalistic interest, natural parks; 0: No protected areas or without naturalistic interest.                                                       |
| Water             | Lakes                                                | <a href="http://www.resdc.cn">http://www.resdc.cn</a> | 1000                | Areas where water elements are present all year round                                                                                                                                         |
|                   | Beach land                                           | <a href="http://www.resdc.cn">http://www.resdc.cn</a> | 2000                |                                                                                                                                                                                               |
|                   | Rivers                                               | <a href="http://www.resdc.cn">http://www.resdc.cn</a> | 1000                |                                                                                                                                                                                               |

**Table S4.** Cross-tabulation matrix was used to determine outdoor recreation demand values.

|                                                   |         | Accessibility (km) |         |         |         |         |      |
|---------------------------------------------------|---------|--------------------|---------|---------|---------|---------|------|
| Popula<br>tion<br>densit<br>y<br>(inhab.<br>ha-1) |         | <0.3               | 0.3-0.6 | 0.6-0.9 | 0.9-1.2 | 1.2-1.5 | >1.5 |
|                                                   | <5      | 0                  | 0       | 0       | 0       | 0       | 0    |
|                                                   | 5-50    | 0                  | 0.2     | 0.2     | 0.4     | 0.4     | 0.6  |
|                                                   | 50-100  | 0                  | 0.2     | 0.4     | 0.4     | 0.6     | 0.8  |
|                                                   | 100-200 | 0                  | 0.4     | 0.4     | 0.6     | 0.6     | 0.8  |
|                                                   | 200-400 | 0                  | 0.4     | 0.6     | 0.6     | 0.8     | 0.8  |
|                                                   | >400    | 0                  | 0.6     | 0.8     | 0.8     | 0.8     | 1    |
